# Supplementary material for: Retracted Article: Water-soluble multidentate polymers compactly coating Ag2S quantum dots with minimized hydrodynamic size and bright emission tunable from red to second near-infrared region
Source: Royal Society of Chemistry journal article supplement (doi:10.1039/c4nr00282b), 2014-01-01
Supplement: c4nr00282b1.pdf [file c4nr00282b1.pdf]

## Supporting Information

- 1 Water-soluble multidentate polymers compactly coating Ag<sub>2</sub>S quantum dots  
2 with minimized hydrodynamic size and bright emission tunable from red to  
3 second near-infrared region

4 Rijun Gui,<sup>1</sup> Ajun Wan,<sup>1,\*</sup> Xifeng Liu,<sup>2</sup> Wen Yuan,<sup>3</sup> and Hui Jin<sup>1</sup>

5 <sup>1</sup> Department of Chemistry, School of Chemistry and Chemical Engineering, Shanghai Jiao Tong University, No.  
6 800 Dongchuan Road, Shanghai 200240, P.R. China.

7 <sup>2</sup> College of Chemistry and Chemical Engineering, Hunan University, Changsha 410082, P.R. China.

8 <sup>3</sup> Department of Chemistry, Michigan State University, East Lansing, Michigan 48824, USA.

9

10 \* Corresponding author. Tel: +86 21 34201245, fax: +86 21 54745706.

11 E-mail address: [wanajun@sjtu.edu.cn](mailto:wanajun@sjtu.edu.cn) (A. Wan).

12

### 13 Materials.

| Abbreviation | Full name                                | Abbreviation | Full name                    |
|--------------|------------------------------------------|--------------|------------------------------|
| PAA          | poly(acrylic acid), M <sub>w</sub> =1750 | NHS          | N-hydroxysuccinimide         |
| Fmoc-EDA     | N-Fmoc-ethylenediamine                   | DIC          | N,N'-diisopropylcarbodiimide |
| BME          | β-mercaptoethanol                        | DMF          | dimethylformamide            |
|              |                                          | DMSO         | dimethylsulfoxide            |

14

### 15 Part S1. The preparation of multidentate polymers

#### 16 Preparation

17 Briefly, 1 g of PAA (~14 mmol of carboxylic acids) was dissolved with 25 mL DMSO, and placed in a 100 mL  
18 three-necked flask. After 24 h stirring at 35 °C, cysteamine (0.18 g, 2.4 mmol) and Fmoc-EDA (0.68 g, 2.4 mmol)  
19 were dissolved in 10 mL DMSO, and the resultant mixed solution was added to the above flask. The mixture in this  
20 flask was protected from light and bubbled with N<sub>2</sub> flow for 30 min at 35 °C. Then, NHS (1 mg, 9 mmol) dissolved  
21 in 5 mL DMSO was added. After that, DIC (0.74 g, 5.8 mmol) was added slowly over the course of 40 min under  
22 vigorous stirring. The reaction mixture was bubbled with N<sub>2</sub> flow for additional 30 min, and then the reaction was  
23 allowed to proceed for 7 days at 40 °C in the dark. Afterward, 15 mL of piperidine was added, the reaction solution  
24 was stirred for 4 h to deprotect the primary amines. BME (0.5 g, 6.4 mmol) was added to quench the reaction, and  
25 the solution was stirred for additional 2 h at 40 °C, followed by cooling it to room temperature and filtering.

26 The resultant solution was condensed to 4 mL at 45 °C using a rotary evaporator, and the products (multidentate  
27 polymers) were precipitated with the mixture of ice-cold acetone/chloroform (v/v, 2/1), and then were isolated *via*  
28 centrifugation. The polymers were dissolved in 5 mL DMF, filtered and precipitated with acetone/chloroform again.  
29 The polymers were treated repeated three times, and finally were washed with acetone, dried in vacuum, and stored  
30 under N<sub>2</sub> atmosphere.

#### 31 Determination of Reactive Thiols and Amines

32 Using fluorescamine and Ellman's reagent, the reactive amines and thiols of the freshly prepared polymers were  
33 analyzed. For the determination of amines, fluorescamine dissolved in DMSO (10 mg/mL) and glycine standards  
34 dissolved in deionized water (0.1 μm-1.0 mM) were freshly prepared, respectively. In detail, 0.4 mL water, 25 μL  
35 of sodium borate buffer (1 M, pH 8.5), 50 μL samples or standards, and 14 μL of fluorescamine solution were  
36 mixed together. After stirring for 20 min in the dark, fluorescence intensity (at 470 nm) of mixture solution was

## Supporting Information

1 measured (excited at 380 nm). The polymers (10 µg/mL) were analyzed immediately after dissolution in sodium  
2 hydroxide (20 mM). For the determination of thiols, Ellman's reagent (as a 2 mM stock solution) dissolved in  
3 sodium acetate buffer (50 mM, pH 4.7), L-cysteine standards (10 µM-0.1 M) dissolved in deionized water were  
4 freshly prepared at 4 °C. After mixing 0.85 mL of water, 10 µL samples or standards, 100 µL of Tris buffer (1 M,  
5 pH 8.5), and 50 µL of Ellman's reagent together, the polymers (0.5 mg/mL) were analyzed immediately after  
6 dissolution with 20 mM of sodium hydroxide. By drawing standard curves, the determination of the molar amount  
7 of thiol or amine per gram of polymers was conducted. The determined values were converted to moles of  
8 functional group per polymer chain using the molecular weight of the polymers, which was calculated to be ~2.2  
9 kDa *via* gel filtration chromatography. As a result, for freshly prepared multidentate polymers, each polymer  
10 molecule contains approximately ~3.5 active thiols and ~3.0 active amines, according to detected results from  
11 Ellman's reagent and fluorescamine assays.

12  
13 **Table S1. Comparison of Synthetic Conditions for Preparing Ag<sub>2</sub>S QDs with Different Reaction**  
14 **Temperature (Temp.), Precursors, Solvents, Capping Reagents, Emission Wavelengths, Diameters and**  
15 **PLQYs.**

| Precursors                                                            | Solvents                              | Capping reagents | Temp. (°C) | Emission (nm) | Diameter TEM (nm)             | PLQY (%) | <sup>b</sup> Ref. |
|-----------------------------------------------------------------------|---------------------------------------|------------------|------------|---------------|-------------------------------|----------|-------------------|
| (C <sub>2</sub> H <sub>5</sub> ) <sub>2</sub> NCS <sub>2</sub> Ag     | 1-octadecene, octadecylamine          | Oleic acid       | 200        | 1058          | 10.2                          | ---      | (14)              |
| (C <sub>2</sub> H <sub>5</sub> ) <sub>2</sub> NCS <sub>2</sub> Ag     | 1-dodecanethiol, cyclohexane, ethanol | DHLA             | 230        | 1150-1200     | 5.4-7                         | 5.8      | (15)              |
| (C <sub>2</sub> H <sub>5</sub> ) <sub>2</sub> NCS <sub>2</sub> Ag,    | 1-dodecanethiol, cyclohexane, ethanol | DHLA, 6-PEG      | 210        | 1200          | 5.4, <sup>a</sup> 26.8        | 15.5     | (16)              |
| AgAc, (TMS) <sub>2</sub> S, S powder, AgNO <sub>3</sub>               | 1-octadecene, myristic acid, toluene  | 1-octylamine     | 110        | 690-1227      | 1.5-4.6                       | 0.18     | (17)              |
| AgNO <sub>3</sub> , 3-MPA                                             | Ethylene glycol                       | 3-MPA            | 145        | 510-1221      | 1.5-6.3                       | 2.1      | (20)              |
| AgAc, GSH                                                             | Ethylene glycol                       | GSH              | 150        | 1106          | 7.6                           | 3.3      | (21)              |
| AgNO <sub>3</sub> , GSH                                               | Water                                 | GSH              | 95         | 960-1015      | 5.5                           | 1.97     | (22)              |
| AgNO <sub>3</sub> , S-N <sub>2</sub> H <sub>4</sub> ·H <sub>2</sub> O | Water                                 | GSH              | Room temp. | 624-727       | 1.7-3.7                       | 1.2      | (23)              |
| AgNO <sub>3</sub> , Na <sub>2</sub> S                                 | Water                                 | BSA              | Room temp. | 1050-1294     | 3.3, <sup>b</sup> 10          | 1.8      | (6)               |
| AgNO <sub>3</sub> , Na <sub>2</sub> S                                 | Water                                 | BSA, antiVEGF    | Room temp. | 840           | 2.1                           | ---      | (24)              |
| AgNO <sub>3</sub> , Na <sub>2</sub> S                                 | Water                                 | 2-MPA            | 90         | 780-950       | 2.3-3.1, <sup>a</sup> 3.0-4.7 | 7-39     | (25)              |

16 Note: <sup>a</sup> The diameters of Ag<sub>2</sub>S QDs determined by DLS. <sup>b</sup> The referred references (Ref.) listed in the “**References**”  
17 as below. Abbreviations of precursors and capping reagents have been provided in the following auxiliary table.

18  
19 **Auxiliary Table**

| Abbreviation         | Full name                | Abbreviation | Full name                         |
|----------------------|--------------------------|--------------|-----------------------------------|
| (TMS) <sub>2</sub> S | hexamethyldisilathiane   | DHLA         | dihydrolipoic acid                |
| 3-MPA                | 3-mercaptopropionic acid | 6-PEG        | six-armed poly(ethylene glycol)   |
| GSH                  | glutathione              | BSA          | bovine serum albumin              |
| AgAc                 | silver acetate           | antiVEGF     | vascular endothelia growth factor |

## Supporting Information

|                                                   |                                  |       |                          |
|---------------------------------------------------|----------------------------------|-------|--------------------------|
|                                                   |                                  |       | antibody                 |
| S-N <sub>2</sub> H <sub>4</sub> ·H <sub>2</sub> O | sulfur-hydrazine hydrate complex | 2-MPA | 2-mercaptopropionic acid |

### 1 References (based on the order of manuscript)

- 2 (6) Yang, H. Y.; Zhao, Y. W.; Zhang, Z. Y.; Xiong, H. M.; Yu, S. N. *Nanotechnology* **2013**, *24*, 055706.  
3 (14) Du, Y.; Xu, B.; Fu, T.; Cai, M.; Li, F.; Zhang, Y.; Wang, Q. *J. Am. Chem. Soc.* **2010**, *132*, 1470-1471.  
4 (15) Shen, S.; Zhang, Y. J.; Peng, L.; Du, Y.; Wang, Q. *Angew. Chem., Int. Ed.* **2011**, *50*, 7115-7118.  
5 (16) Hong, G.; Robinson, J. T.; Zhang, Y.; Diao, S.; Antaris, A. L.; Wang, Q.; Dai, H. *Angew. Chem. Int. Ed.*  
6 **2012**, *51*, 9818-9821.  
7 (17) Jiang, P.; Tian, Z. Q.; Zhu, C. N.; Zhang, Z. L.; Pang, D. W. *Chem. Mater.* **2012**, *24*, 3-5.  
8 (20) Jiang, P.; Zhu, C. N.; Zhang, Z. L.; Tian, Z. Q.; Pang, D. W. *Biomaterials* **2012**, *33*, 5130-5135.  
9 (21) Tan, L.; Wan, A.; Li, H. *Langmuir* **2013**, *29*, 15032-15042.  
10 (22) Tan, L.; Wan, A.; Li, H. *ACS Appl. Mater. Interfaces* **2013**, *5*, 11163-11171.  
11 (23) Wang, C.; Wang, Y.; Xu, L.; Zhang, D.; Liu, M.; Li, X.; Sun, H.; Lin, Q.; Yang, B. *Small* **2012**, *8*, 3137-3142.  
12 (24) Wang, Y.; Yan, X. P. *Chem. Commun.* **2013**, *49*, 3324-3326.  
13 (25) Hocaoglu, I.; Cizmeciyan, M. N.; Erdem, R.; Ozen, C.; Kurt, A.; Sennaroglu, A.; Acar, H. Y. *J. Mater. Chem.*  
14 **2012**, *22*, 14674-14681.  
15

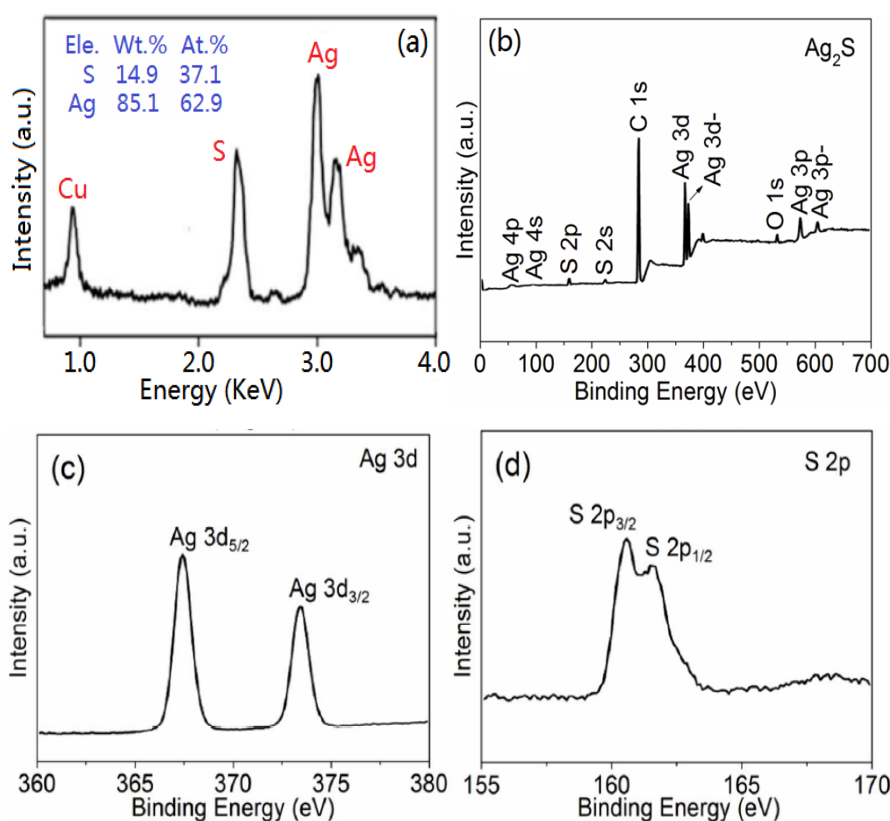

**Fig. S1.** (a) EDX and (b) XPS spectra of Ag<sub>2</sub>S QDs. (c) Ag 3d and (d) S 2p signals in XPS spectra of Ag<sub>2</sub>S QDs.

### Part S2. The calculation of the molar capping ratio for Ag<sub>2</sub>S QDs

The molar capping ratio (MCR) was defined as the number of thiol and amine groups per surface atom of Ag<sub>2</sub>S QDs,  $MCR = (N_{SH} + N_{NH_2}) / (N_{Ag} + N_S)$ . For instance, a 3.7 nm of Ag<sub>2</sub>S QD has ~250 total surface atoms, obtained from theoretical calculations and empirical data (*Chem. Mater.* **2003**, *15*, 4300-4308.; *J. Am. Chem. Soc.* **2005**, *127*, 2524-2532.; *Nano Lett.* **2005**, *5*, 331-338.; *J. Phys. Chem.* **1994**, *98*, 4109-4117.; *J. Phys. Chem. C* **2007**, *111*, 75-

## Supporting Information

79.; *Nano Lett.* **2004**, *4*, 2361-2365.; *J. Phys. Chem. B* **2005**, *109*, 19320-19328). One polymer chain contains 3.5 thiols and 3.0 amines. So, the optimal MCR of 1.8 (in manuscript) indicates the addition of ~70 polymer chains per QDs, or ~150 mg of polymer per  $\mu\text{mol}$  of QDs. At an elevated temperature, the polymers bind to the QD. This binding is highly efficient because no free amine could be detected in dialysate during purification.

The polydispersity index (PDI) was calculated from chromatograms using conventional techniques for polymer characterization, with the formula:  $\text{PDI} = M_w / M_n$ . The PDI for pure protein solutions typically was 1.25-1.35.

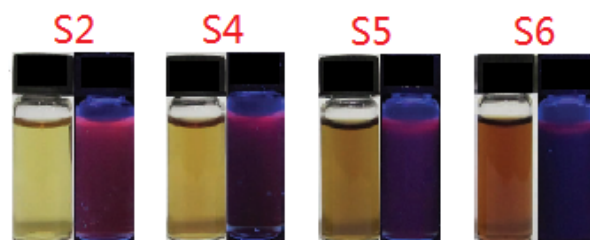

Left: Under normal light (room light)

Right: Under excitation light (UV-365nm radiation)

**Fig. S2.** A series of photographs of the as-prepared  $\text{Ag}_2\text{S}$  QDs in aqueous solution for different samples under normal (room) light and UV (365 nm) light illumination.

**Table S2. Concentration Analysis of  $\text{Ag}^+$  Ions Leaked from  $\text{Ag}_2\text{S}$  QDs in Cell Culture Media.**

| <sup>a</sup> $C_0$ (mg/mL) | <sup>b</sup> $C_{24\text{ h}}$ (mg/mL) | <sup>c</sup> LR (%) | <sup>d</sup> RSD | <sup>e</sup> $C_{48\text{ h}}$ (mg/mL) | LR (%) | RSD  |
|----------------------------|----------------------------------------|---------------------|------------------|----------------------------------------|--------|------|
| 0.01                       | $7.00 \times 10^{-6}$                  | 0.07                | 3.85             | $1.40 \times 10^{-5}$                  | 0.14   | 2.05 |
| 0.05                       | $1.45 \times 10^{-4}$                  | 0.29                | 1.69             | $1.50 \times 10^{-4}$                  | 0.30   | 3.59 |
| 0.1                        | $3.20 \times 10^{-4}$                  | 0.32                | 2.46             | $4.90 \times 10^{-4}$                  | 0.49   | 0.92 |
| 0.5                        | $3.95 \times 10^{-3}$                  | 0.79                | 3.09             | $4.20 \times 10^{-3}$                  | 0.84   | 2.84 |
| 1.0                        | $8.60 \times 10^{-3}$                  | 0.86                | 3.65             | $9.10 \times 10^{-3}$                  | 0.91   | 1.46 |

<sup>a</sup> The concentration of  $\text{Ag}_2\text{S}$  QDs before incubation.

<sup>b</sup> The concentration of  $\text{Ag}^+$  ions leaked from  $\text{Ag}_2\text{S}$  QDs when incubating in cell culture media for 24 h.

<sup>c</sup> The leakage ratio (LR) of  $\text{Ag}^+$  ions:  $\text{LR} (\%) = 100 \times (C_{24\text{ h or } 48\text{ h}}) / C_0$ .

<sup>d</sup> The relative standard deviation (RSD, %) of LR was defined as  $100 \times (\text{relative standard} / \text{mean})$ .

<sup>e</sup> The concentration of  $\text{Ag}^+$  ions leaked from  $\text{Ag}_2\text{S}$  QDs when incubating in cell culture media for 48 h.

All concentrations were measured by ICP-MS, and expressed as mean of six repeated measurements.

## Supporting Information

---

1  
2
